# Supplementary material for: Investigating the Impact of Delivery Routes for Exon Skipping Therapies in the CNS of DMD Mouse Models
Source: MDPI journal article supplement (doi:10.3390/cells12060908), 2023-03-15
Supplement: s1 [file s1]

# **Supplemental Information for the manuscript:**

## **Investigating the impact of delivery routes for exon skipping therapies in the CNS of DMD mouse models**

Amel Saoudi<sup>1,2</sup>, Claire Fergus<sup>3</sup>, Talia Gileadi<sup>4</sup>, Federica Montanaro<sup>4</sup>, Jennifer Morgan<sup>4</sup>, Vincent P. Kelly<sup>3</sup>, Thomas Tensorer<sup>5</sup>, Luis Garcia<sup>1</sup>, Cyrille Vaillend<sup>2</sup>, Francesco Muntoni<sup>4</sup> and Aurélie Goyenvallé<sup>1\*</sup>

### **Supplemental Information contains:**

- Supplementary figure 1: Schematic representation of the various injection methods and anatomical localization of the brain regions dissected for molecular analysis
- Supplementary figure 2: Comparison of unilateral of bilateral ICV injection of tcDNA-ASO in hDMD mice.
- Supplementary figure 3: In situ biodistribution of PMO and tcDNA following single ICV administration.
- Supplementary figure 4: Comparison of single and repeated ICV delivery of tcDNA in hDMD mice.
- Supplementary figure 5: Biodistribution of ASO following ICM delivery.
- Supplementary figure 6: Comparison of various delivery routes for tcDNA and PMO.
- Supplementary figure 7: Summary of exon skipping efficacy following various delivery routes for tcDNA and PMO.

**A**

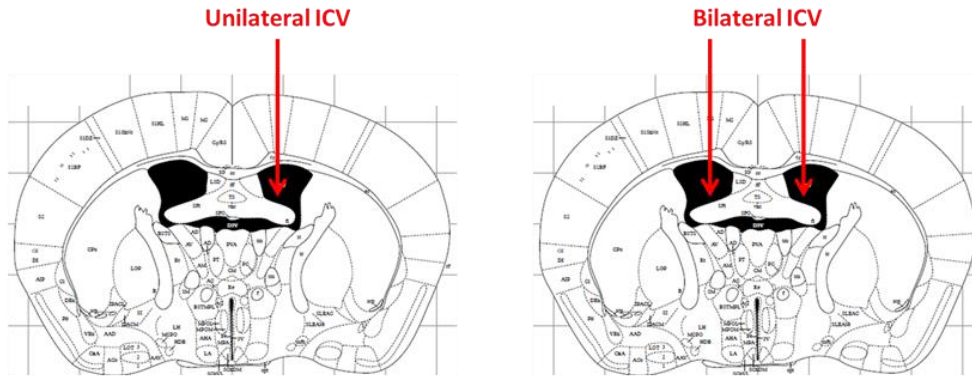

**B**

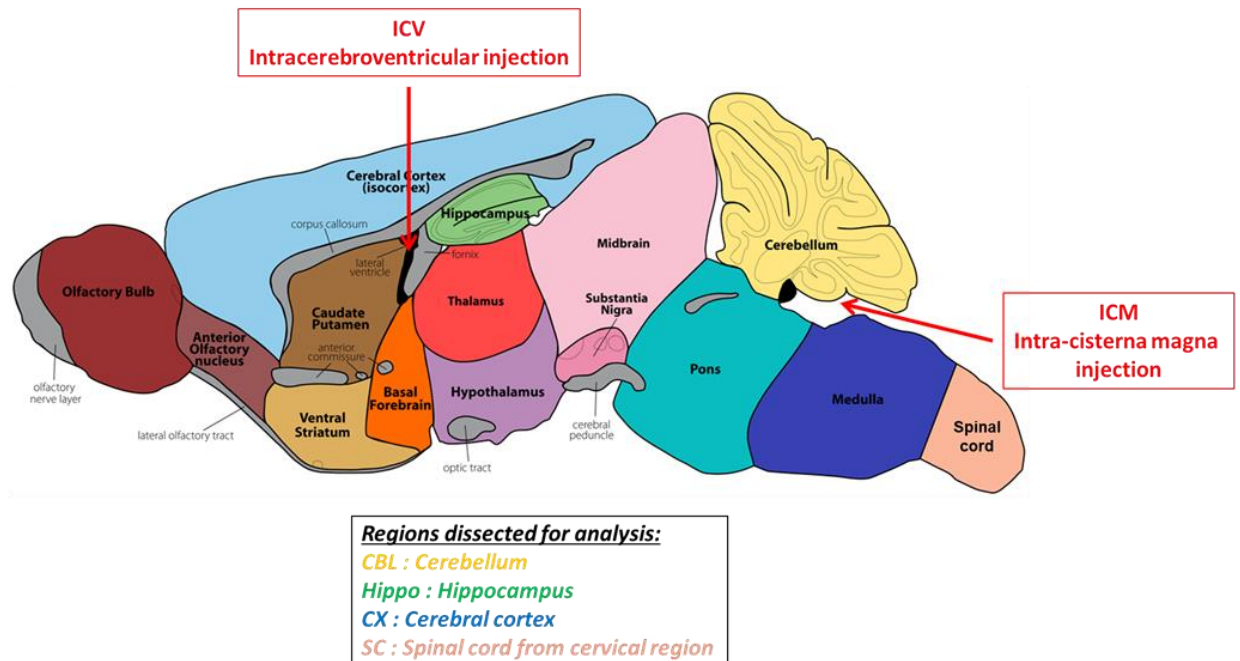

**Supplementary figure 1: Schematic representation of the various injection methods and anatomical localization of the brain regions dissected for molecular analysis. A) representation of coronal sections and B) representation of a sagittal section.**

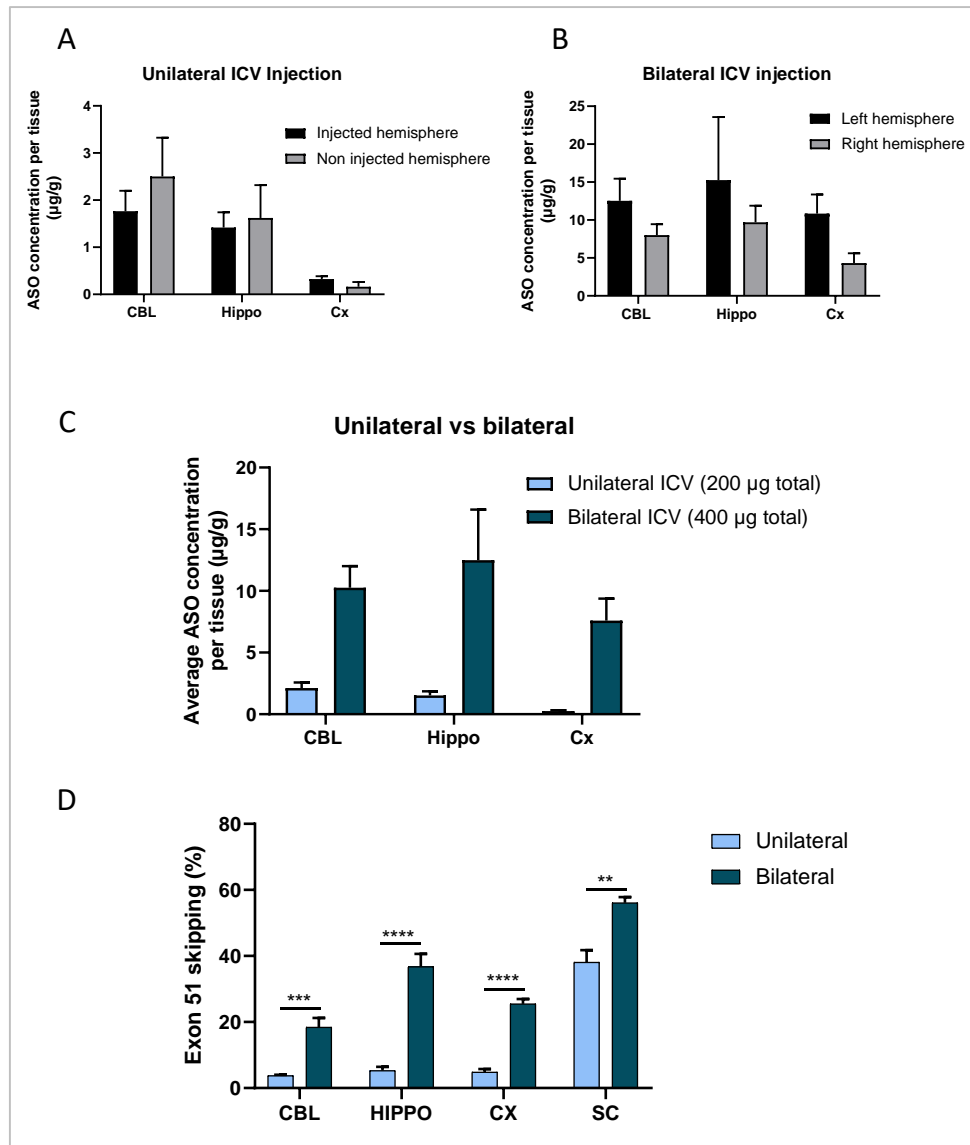

**Supplementary figure 2: Comparison of unilateral of bilateral ICV injection of tcDNA-ASO in hDMD mice.** (A) Quantification by fluorescent hybridization assay of tcDNA-Ex51 content in different CNS regions after a unilateral ICV injection of 200 µg of tcDNA-Ex51. Results are expressed as means  $\pm$  SEM; n=4 hDMD-tcDNA-Ex51. (B) Quantification by fluorescent hybridization assay of tcDNA-Ex51 content in different CNS regions after a bilateral ICV injection of 400 µg of tcDNA-Ex51 (200 µg in each hemisphere). Results are expressed as means  $\pm$  SEM; n=4 hDMD-tcDNA-Ex51. (C) Quantification by fluorescent hybridization assay of tcDNA-Ex51 content in different CNS regions after unilateral or bilateral ICV delivery of tcDNA (200 or 400 µg respectively). Results are expressed as means  $\pm$  SEM; n=3 hDMD. (D) Quantification of exon 51-skipping levels by RT-qPCR in different brain regions after unilateral or bilateral ICV delivery of tcDNA (200 or 400 µg respectively). Results are expressed as means  $\pm$  SEM; n=3 hDMD. CBL: cerebellum, CX: cortex, HIPPO: hippocampus and SC: spinal cord (cervical region). Statistical analysis: RM two-way ANOVA (\*\*p<0.01, \*\*\*p<0.005, \*\*\*\*p<0.001).

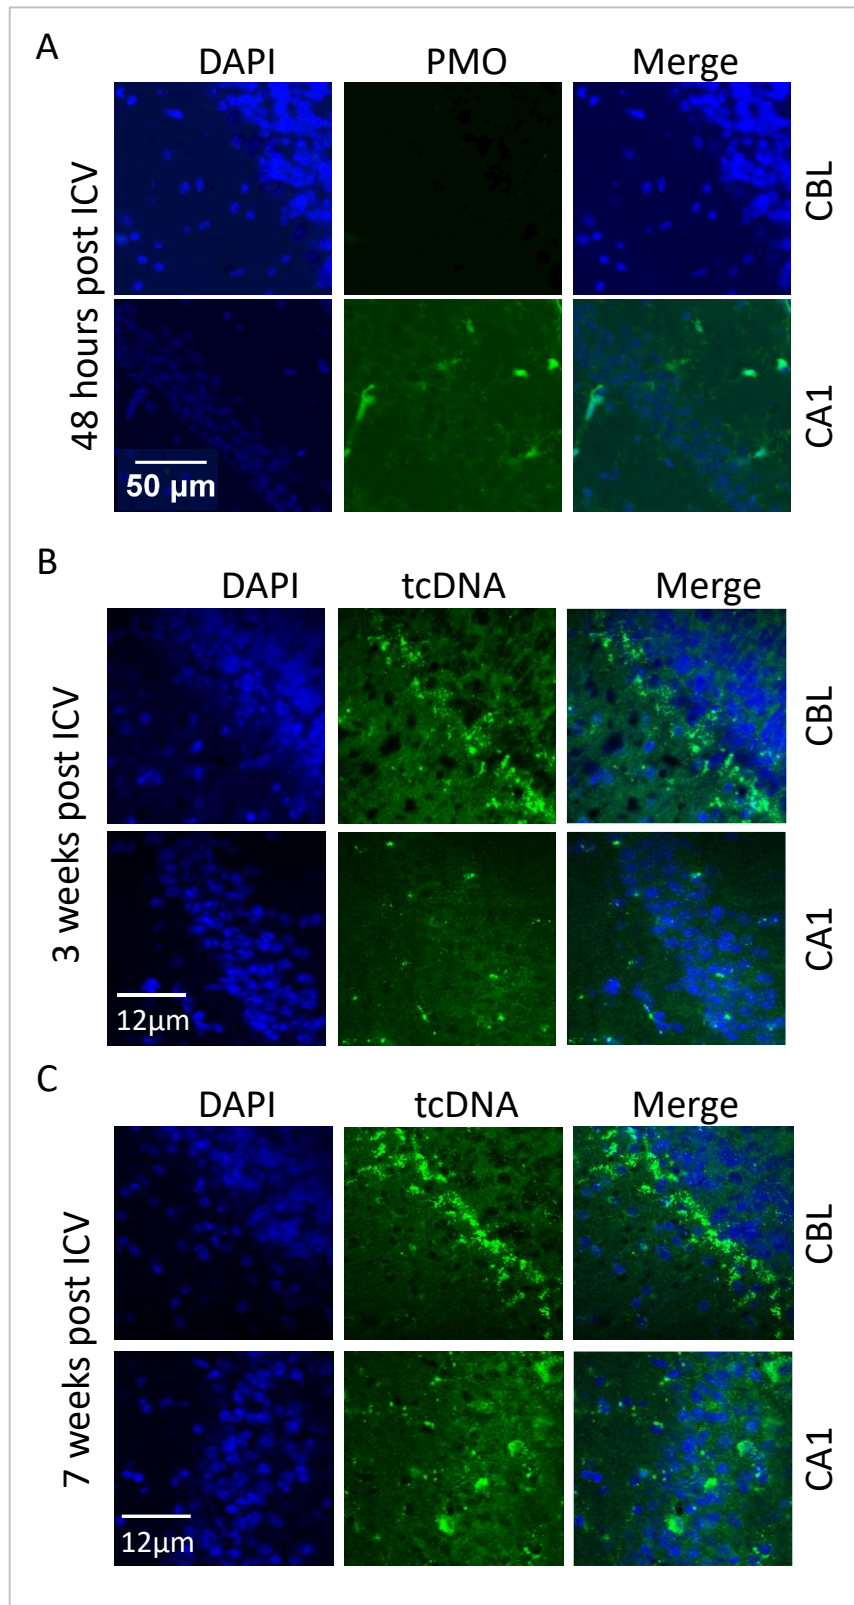

**Supplementary figure 3: *In situ* biodistribution of PMO and tcDNA following single ICV administration.** (A) Carboxyfluorescein-conjugated PMO detected 48 hours after ICV injection in the hippocampus (CA1) and cerebellum (CBL). Scale bar 50 $\mu\text{m}$ . (B) Fluorescent *in situ* hybridization to detect tcDNA-Ex51 3 weeks after ICV injection in hippocampus (CA1) and cerebellum (CBL). (C) Fluorescent *in situ* hybridization to detect tcDNA-Ex51 7 weeks after ICV injection in hippocampus (CA1) and cerebellum (CBL). Scale bar 12 $\mu\text{m}$ .

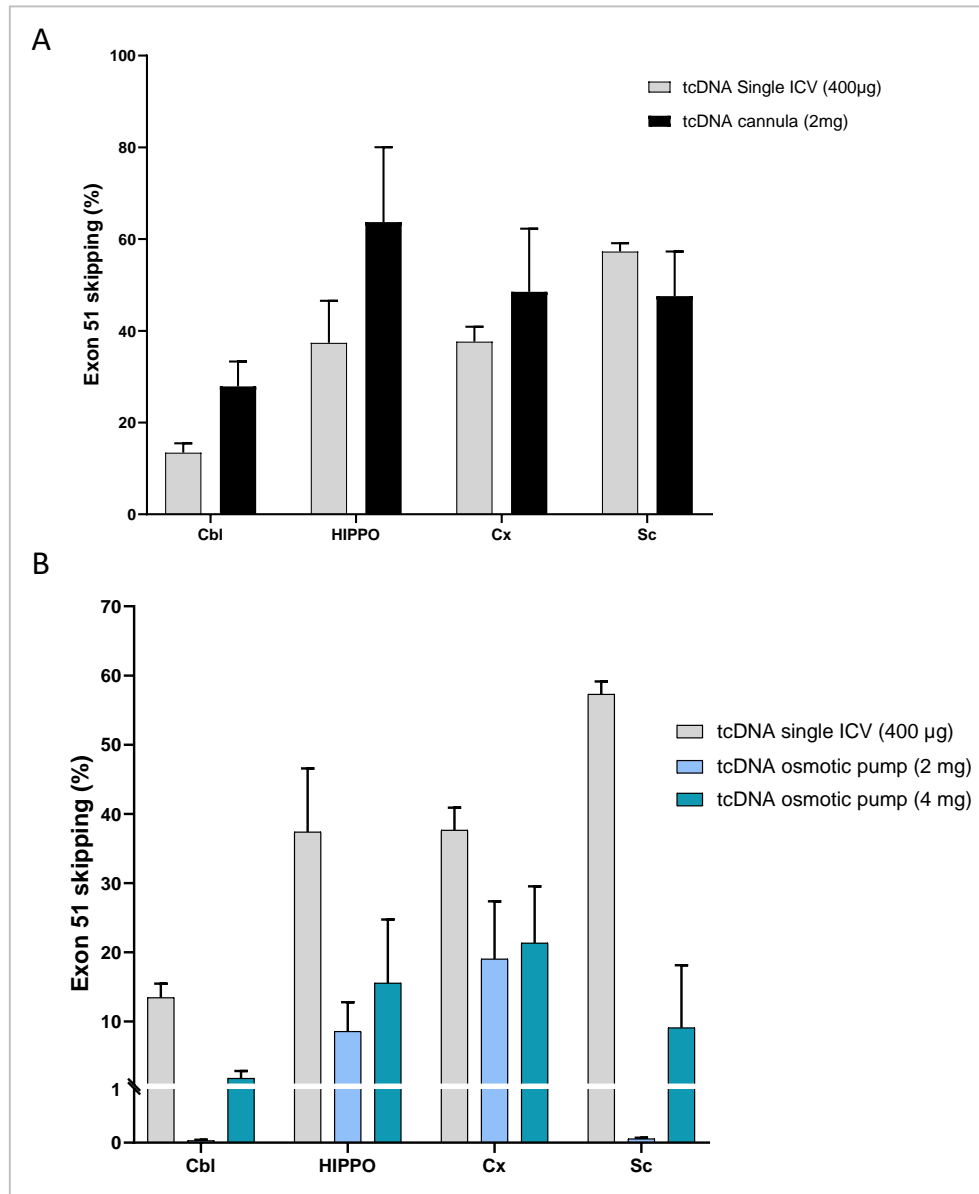

**Supplementary figure 4: Comparison of single and repeated ICV delivery of tcDNA in hDMD mice.** (A) Quantification of exon 51-skipping levels by RT-qPCR in different brain regions (CBL: cerebellum, CX: cortex, HIPPO: hippocampus and SC: spinal cord) after tcDNA-Ex51 repeated ICV injections via a cannula (2 mg), analyzed 4 weeks after administration. Results are expressed as means  $\pm$  SEM; n=4 hDMD mice. (B) Quantification of exon 51-skipping levels by RT-qPCR in different brain regions (CBL: cerebellum, CX: cortex, HIPPO: hippocampus and SC: spinal cord) after very slow infusion of 2 and 4 mg of tcDNA-Ex51 via osmotic pumps, analyzed 4 weeks after administration. Results are expressed as means  $\pm$  SEM; n=4 hDMD mice.

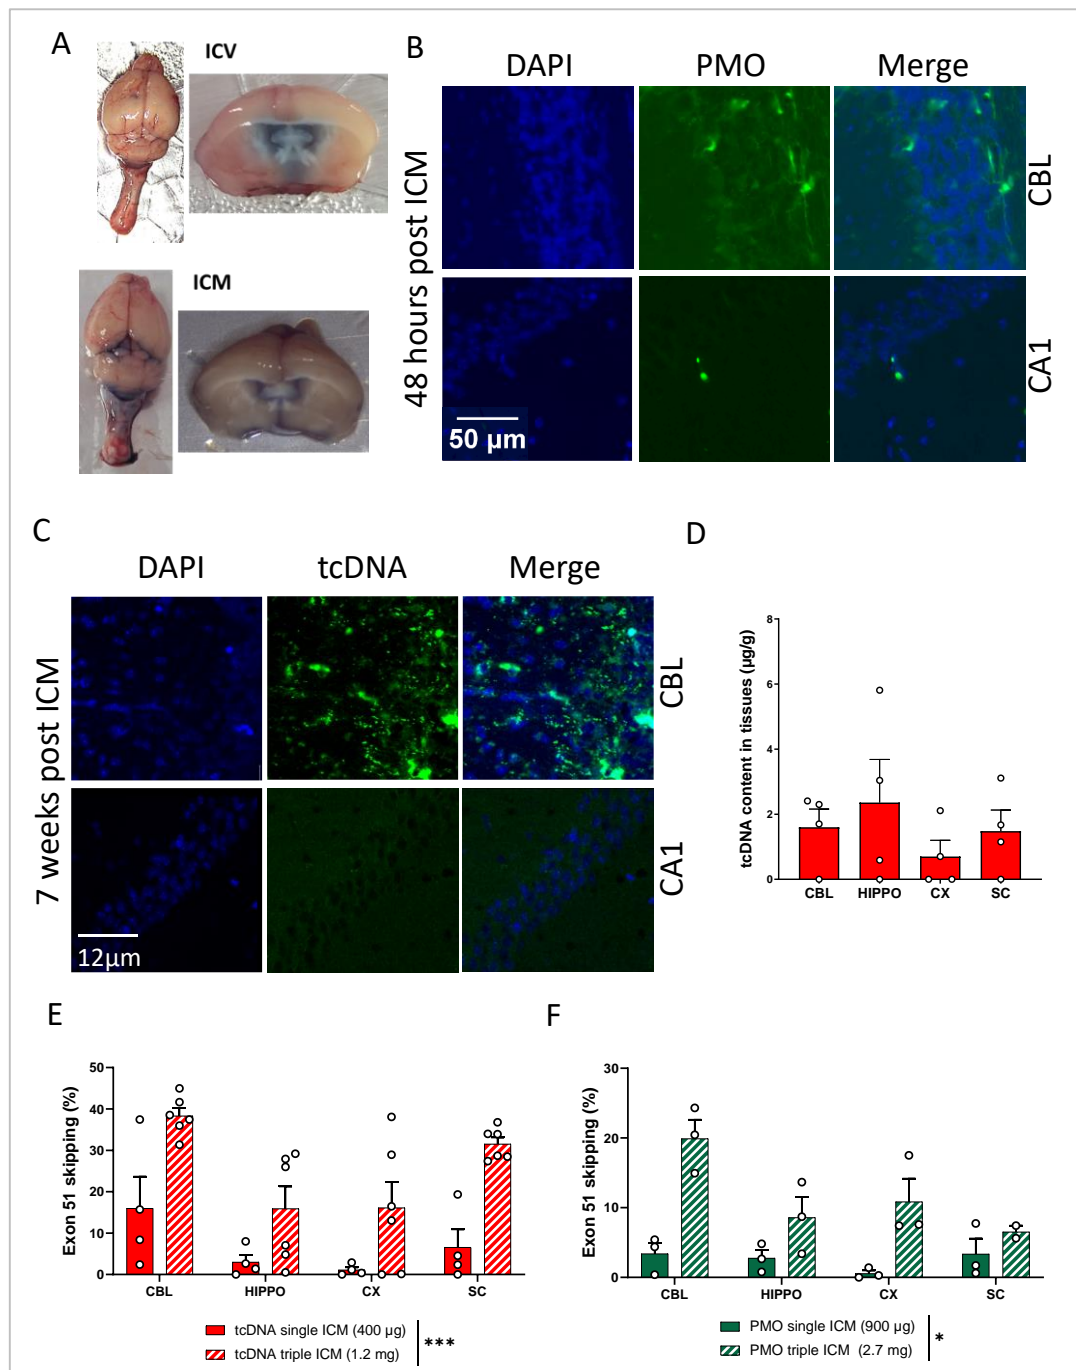

**Supplementary figure 5: Biodistribution of ASO following ICM delivery.** (A) Trypan blue diffusion following ICV and ICM injections. (B) Carboxyfluorescein-conjugated PMO detected 48 hours after ICV injection in the hippocampus (CA1) and cerebellum (CBL). Scale bar 50  $\mu$ m. (C) Fluorescent *in situ* hybridization of tcDNA-Ex51 7 weeks after ICM injection in the CA1 of the hippocampus and the cerebellum (CBL). Scale bar 12  $\mu$ m. (D) Quantification by fluorescent hybridization assay of tcDNA-Ex51 content in various CNS regions (CBL: cerebellum, CX: cortex, HIPPO: hippocampus and SC: spinal cord) 7 weeks after ICM delivery. Results are expressed as means  $\pm$  SEM; n=4 mdx52-tcDNA-Ex51. (E) Quantification of exon 51-skipping levels by RT-qPCR in different brain regions (CBL: cerebellum, CX: cortex, HIPPO: hippocampus and SC: spinal cord) after tcDNA single ICM compared to tcDNA triple ICM, analyzed 7 weeks after administration. Results are expressed as means  $\pm$  SEM; n=4 single ICM, analyzed 7 weeks after administration. \*\*\* indicates p < 0.001. (F) Quantification of exon 51-skipping levels by RT-qPCR in different brain regions (CBL: cerebellum, CX: cortex, HIPPO: hippocampus and SC: spinal cord) after PMO single ICM compared to PMO triple ICM, analyzed 7 weeks after administration. Results are expressed as means  $\pm$  SEM; n=4 single ICM, analyzed 7 weeks after administration. \* indicates p < 0.05.

ICM and n=6 triple ICM. RM Two-way ANOVA: structure effect  $p=0.0017$ , ASO chemistry effect \*\*\*  $p=0.0005$ . (F) Quantification of exon 51-skipping levels after PMO single ICM compared to PMO triple ICM, analyzed 7 weeks after administration. Results are expressed as means  $\pm$  SEM; n=3 single ICM and n=3 triple ICM. RM Two-way ANOVA: structure effect  $p=0.0224$ , ASO chemistry effect \*  $p=0.0205$ .

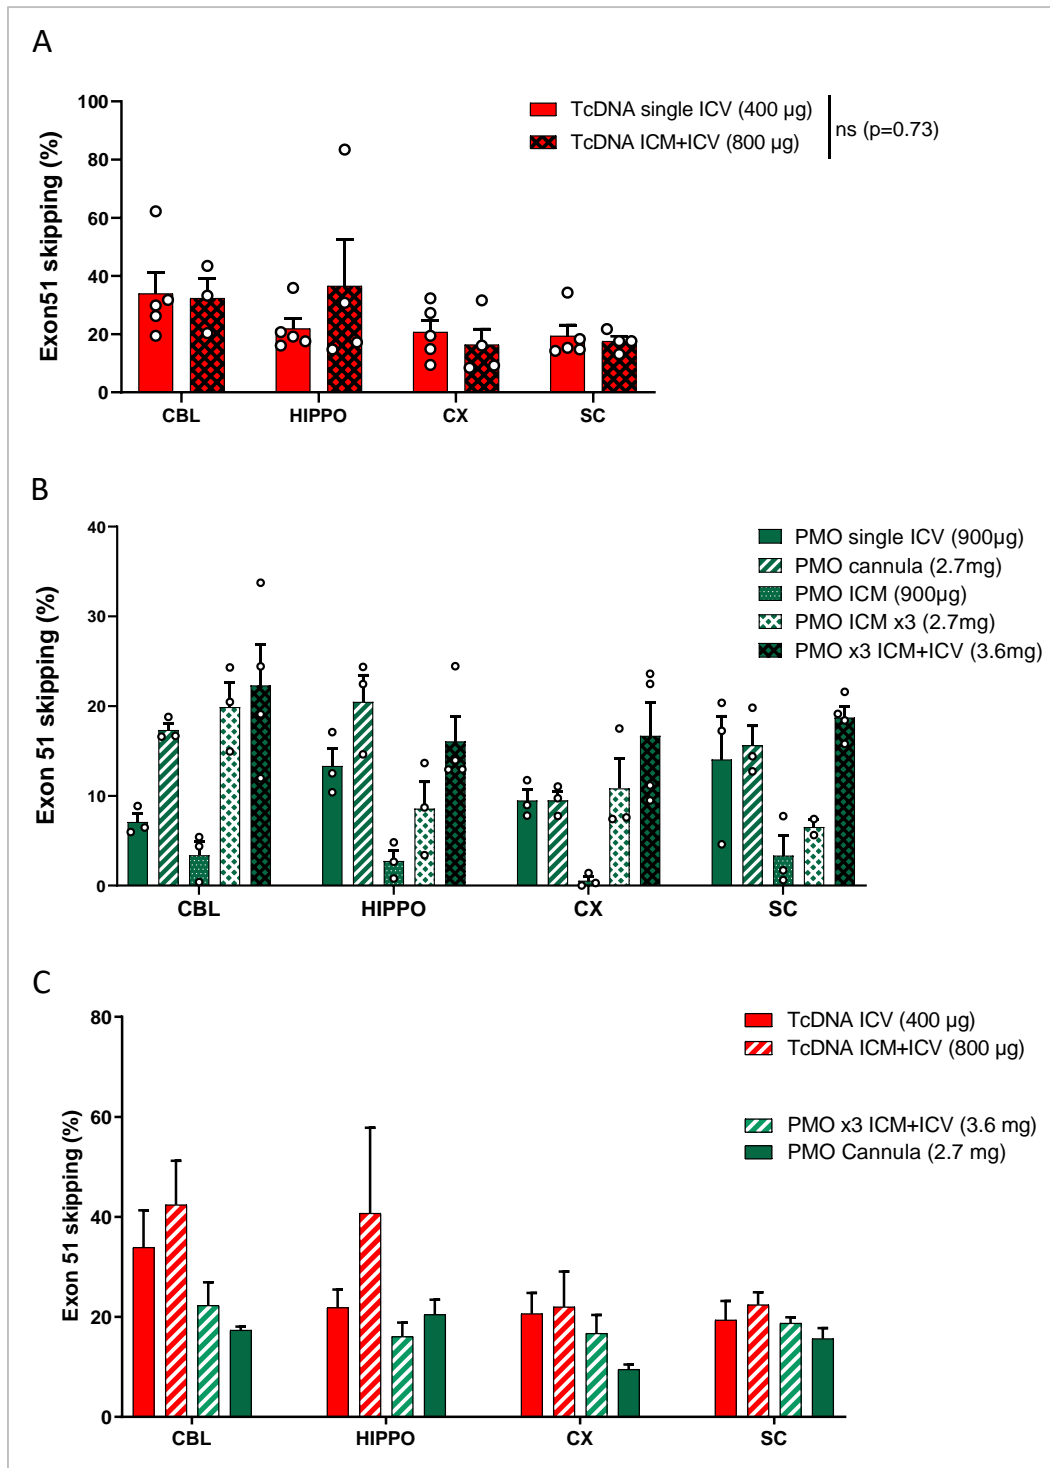

**Supplementary figure 6: Comparison of various delivery routes for tcDNA and PMO.** (A) Quantification of exon 51-skipping levels by RT-qPCR in different brain regions (CBL: cerebellum, CX: cortex, HIPPO: hippocampus and SC: spinal cord) after tcDNA ICM+ICV injection compared to tcDNA single ICV, analyzed 7 weeks after administration. Results are expressed as means  $\pm$  SEM; n=5 single ICV and n=4 ICM+ICV. RM Two-way ANOVA: ASO chemistry effect p=0.73. (B) Comparison of exon skipping level measured in various brain regions after various delivery routes of PMO-Ex51. (C) Comparison of the 2 best delivery routes for tcDNA and PMO in various brain regions. Results are expressed as means  $\pm$  SEM.



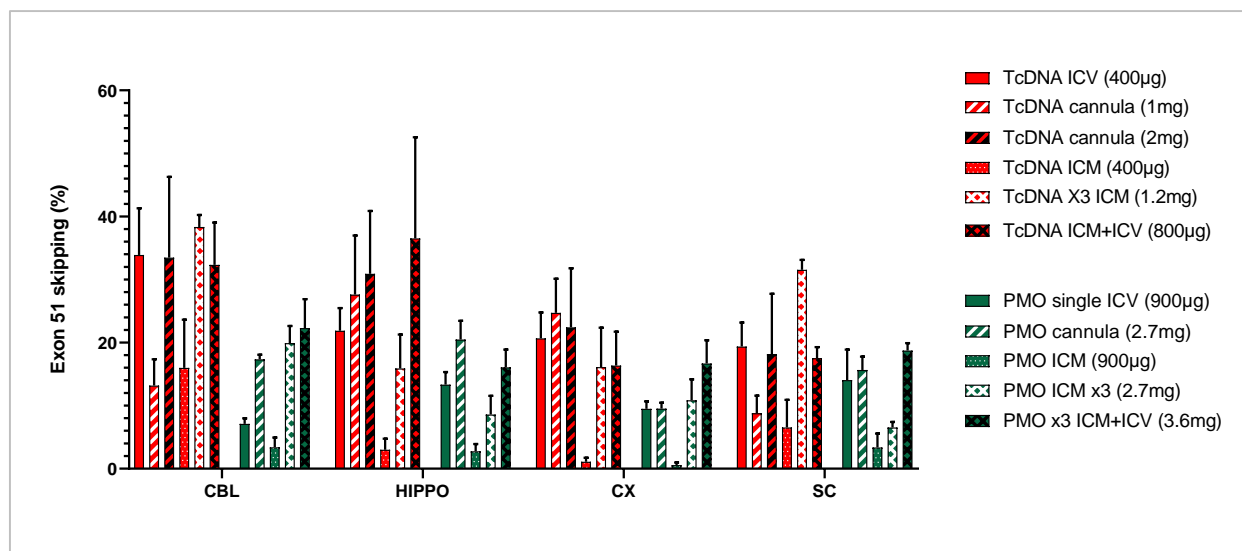

**Supplementary figure 7: Summary of exon skipping efficacy following various delivery routes for tcDNA and PMO.** Quantification of exon 51-skipping levels by RT-qPCR in different brain regions (CBL: cerebellum, CX: cortex, HIPPO: hippocampus and SC: spinal cord). Results are expressed as means  $\pm$  SEM.
